# Supplementary material for: Lentiviral vectors for induction of self-differentiation and conditional ablation of dendritic cells
Source: PubMed Central journal article supplement — Gene Ther. 2011 Mar 17;18(8):750–64. doi: 10.1038/gt.2011.15 (PMC3155152; doi:10.1038/gt.2011.15), 2011-03-17
Supplement: gt201115x1.pdf [file gt201115x1.pdf]

### Supplementary Figure S1:

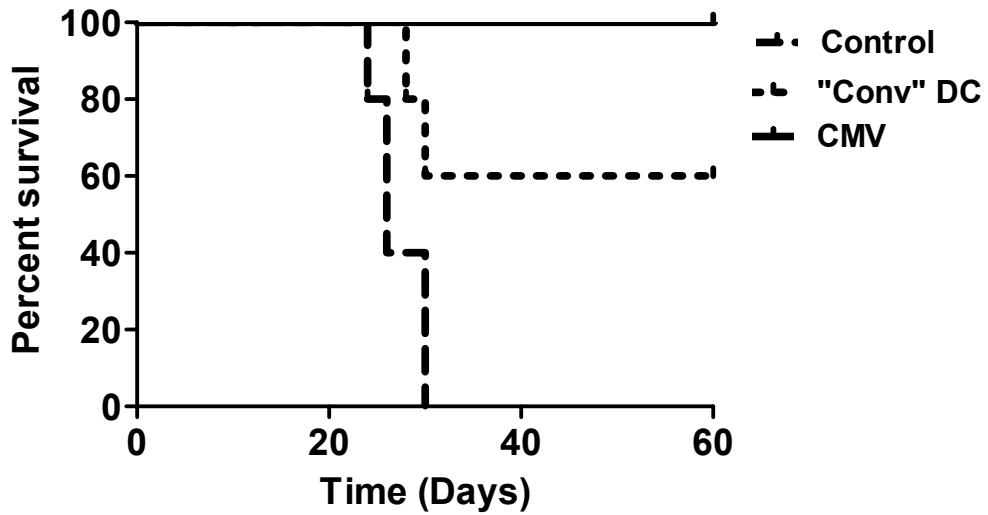

### Supplementary Table S1:

| Groups               | P- values   |
|----------------------|-------------|
| Control vs "Conv" DC | 0.0403 (*)  |
| Control vs CMV       | 0.0026 (**) |
| CMV vs "Conv" DC     | 0.1343 (NS) |
