# Supplementary material for: Lentiviral vectors for induction of self-differentiation and conditional ablation of dendritic cells
Source: PubMed Central journal article supplement — Gene Ther. 2011 Mar 17;18(8):750–64. doi: 10.1038/gt.2011.15 (PMC3155152; doi:10.1038/gt.2011.15), 2011-03-17

# Supplementary Figure 2 (Ref. Fig. 8)

## a Optical Imaging analyses on day 14 after challenge

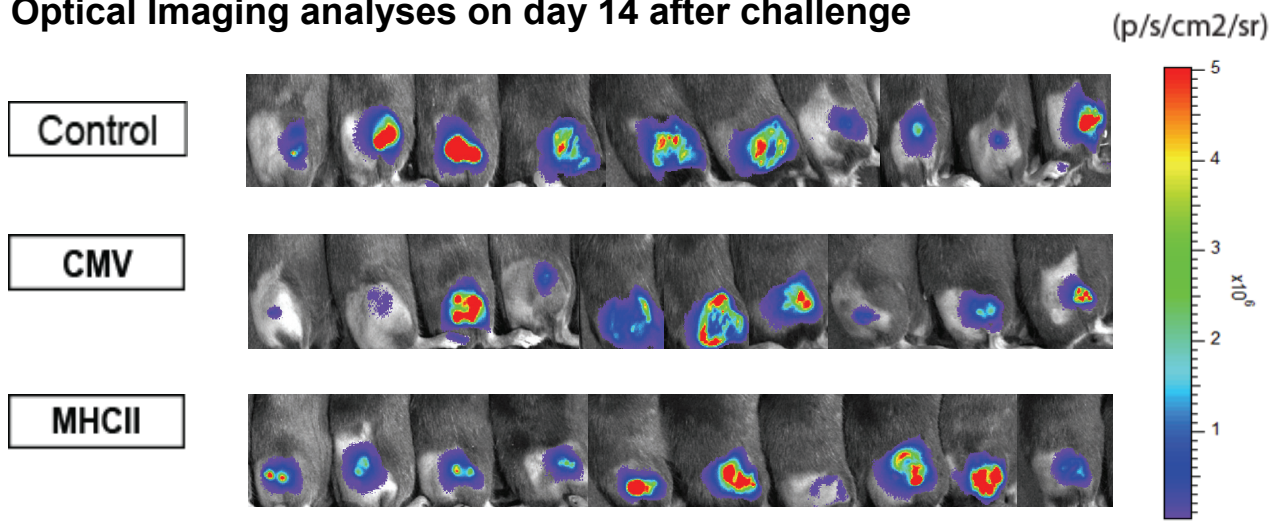

## b Optical imaging quantification

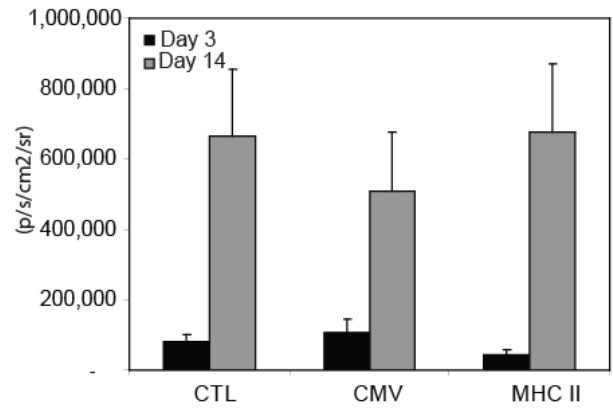

## c Tumor growth analyses

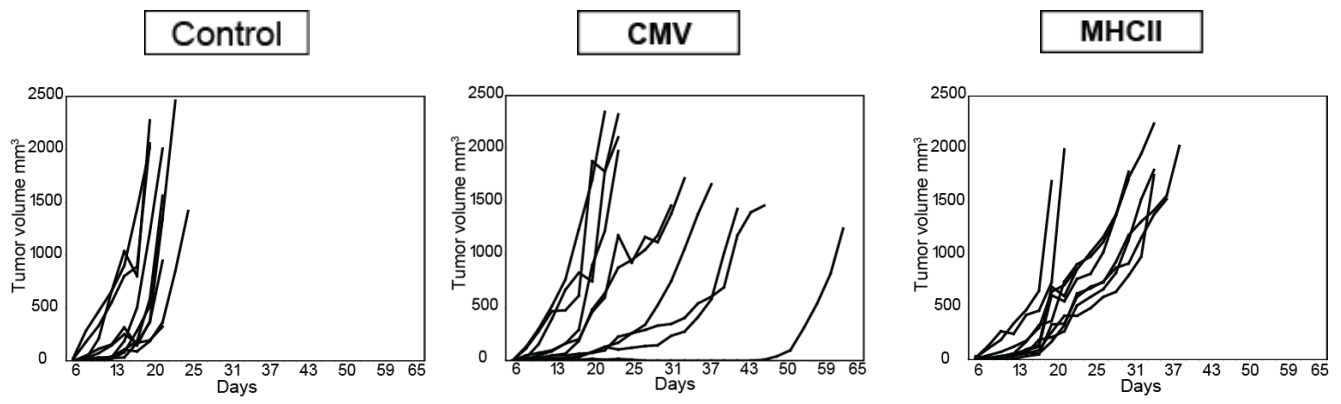

Supplement: gt201115x2.pdf [file gt201115x2.pdf]
